# Supplementary figures and images for: Satellite Subgenomic Particles Are Key Regulators of Adeno-Associated Virus Life Cycle
Source: MDPI journal article supplement (doi:10.3390/v13061185), 2021-06-21

Supplementary Figure S1

A

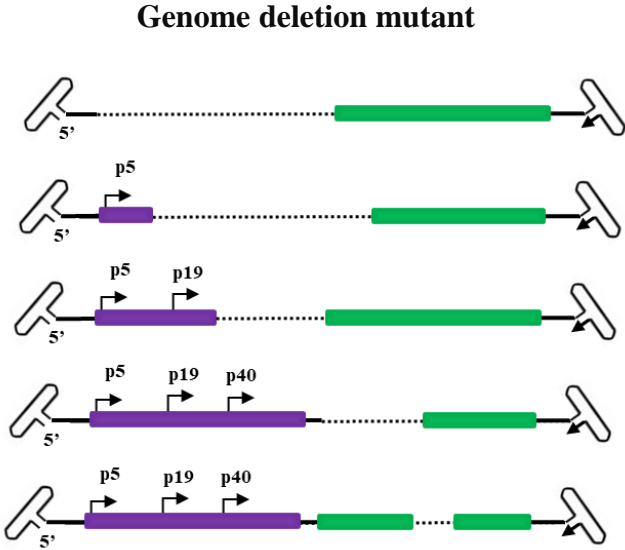

B

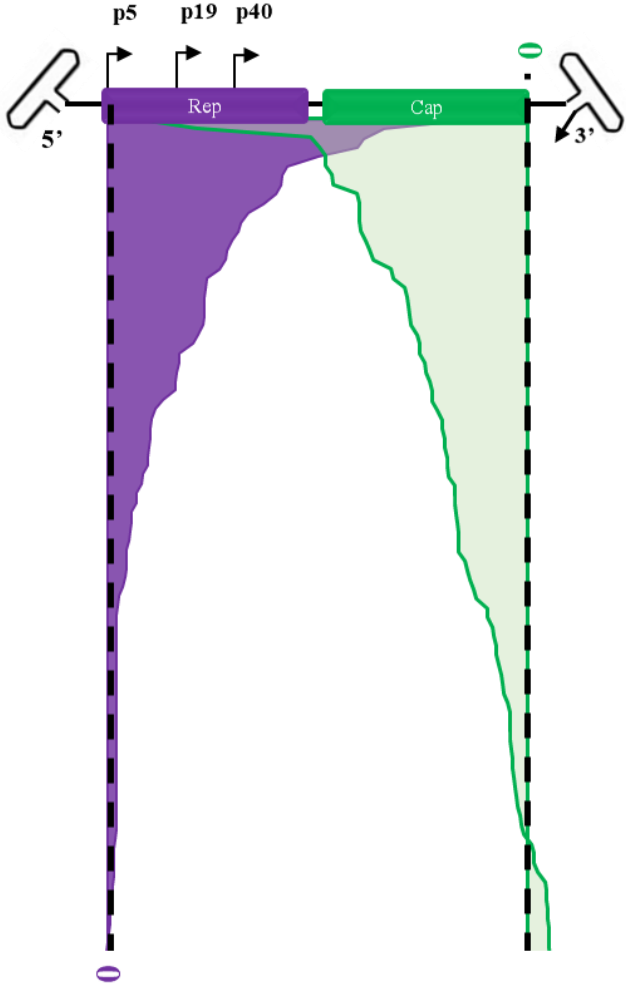

Supplementary Figure S2

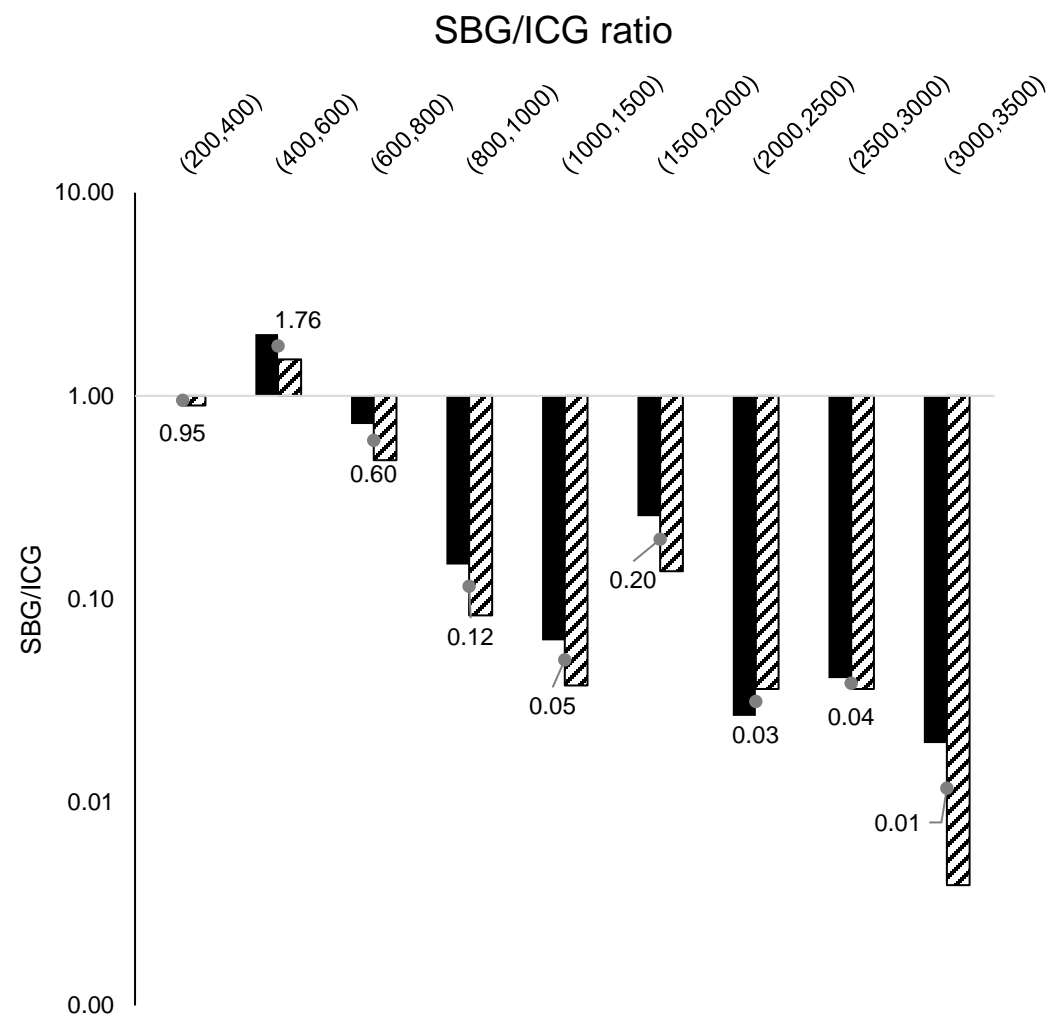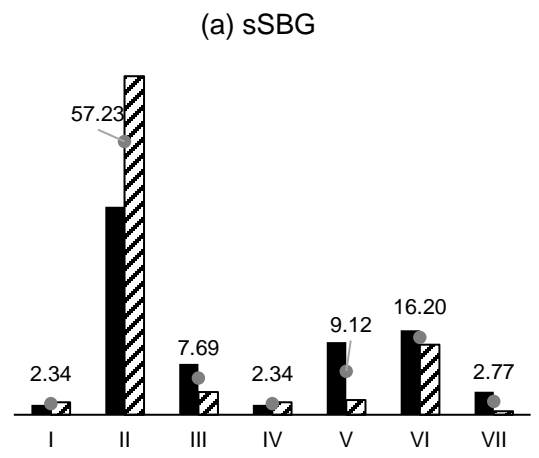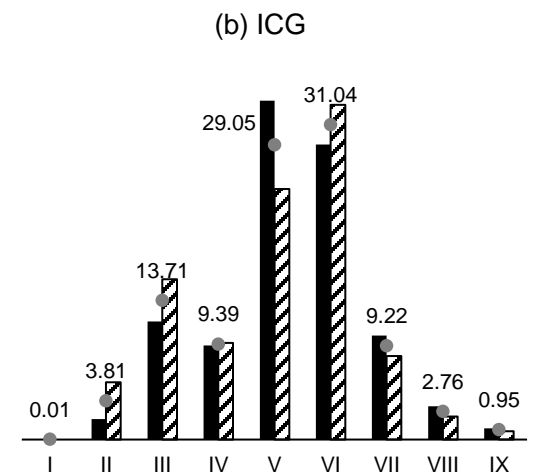

Supplementary Figure S3

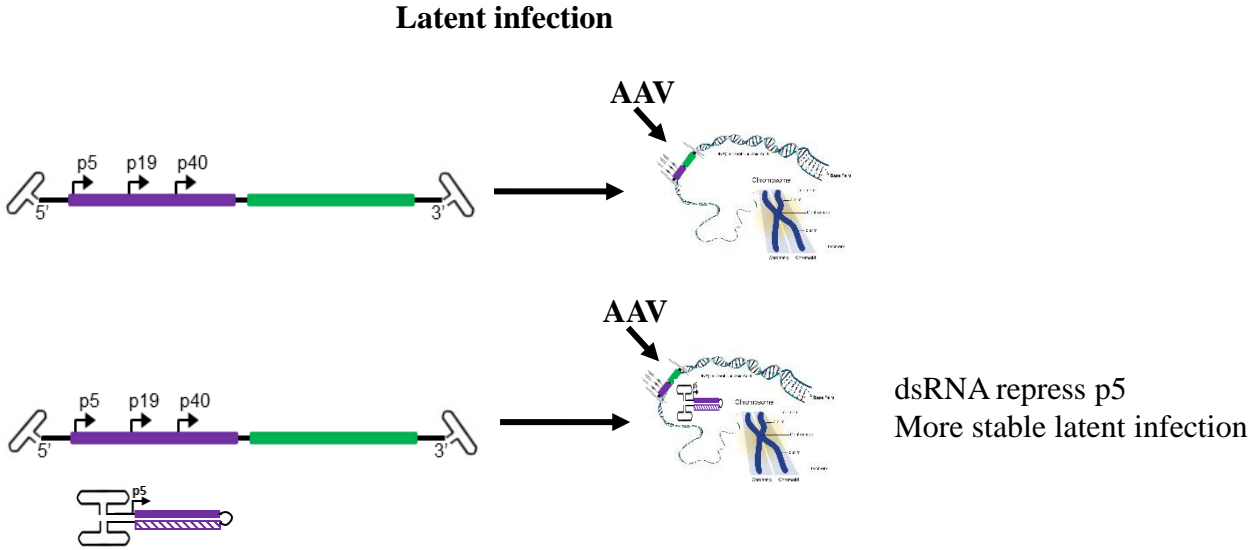

Supplement: s1 [file s1]
